# Supplementary material for: Bio-degradable, fully bio-based, thermally cross-linked superabsorbent polymers from citric acid and glycerol
Source: Royal Society of Chemistry journal article supplement (doi:10.1039/d4gc06323f), 2025-01-01
Supplement: d4gc06323f1.pdf [file d4gc06323f1.pdf]

## Supporting Information file

### Bio-degradable, fully bio-based, thermally cross-linked superabsorbent polymers from citric acid and glycerol

Jingying Chen,<sup>a</sup> Deelan Yen Chan,<sup>b</sup> TaoTao Yang,<sup>a</sup> Daniele Parisi,<sup>a</sup> Bart Reuvers,<sup>b</sup> Theo Veldhuis,<sup>b</sup> Francesco Picchioni,<sup>a</sup> Jing Wu,<sup>\*c</sup> Patrizio Raffa,<sup>\*a</sup> Cor Koning<sup>a,b</sup>

<sup>a</sup>Smart and Sustainable Polymeric Products, Department of Product Technology, Engineering and Technology Institute Groningen, University of Groningen, Nijenborgh 3, 9747 AG Groningen, The Netherlands.

<sup>b</sup>Covestro (Netherlands) B.V., Ceintuurbaan 5, 8022 AW, Zwolle, The Netherlands.

<sup>c</sup>Co-Innovation Center for Textile Industry, Innovation Center for Textile Science and Technology, Donghua University, Shanghai 201620, PR China.

\*Corresponding author

Email address: wuj@dhu.edu.cn (Jing Wu); [p.raffa@rug.nl](mailto:p.raffa@rug.nl) (Patrizio Raffa)

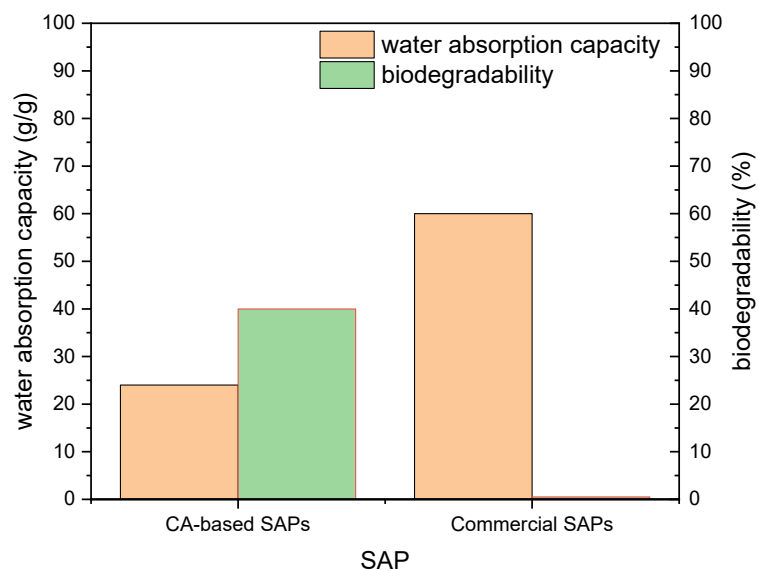

**Figure S1.** Water absorption capacity and biodegradability comparison between SAP-80 and commercial SAP product. The commercial SAP product is the potassium salt of poly(acrylamide-co-acrylic acid) (purchased from Sigma-Aldrich; product no. 432776).
